# Supplementary material for: Synthesis and Characterization of Chloridobis(dimethylglyoximato)4-(2-ferrocenylvinyl)pyridinecobalt(III): A New Heterobinuclear Cobaloxime
Source: Hindawi journal article supplement (doi:10.1155/2016/1385236), 2016-01-01
Supplement: f1 [file 1385236.f1.pdf]

## Supplementary Material

### **Synthesis and Characterization of chloridobis(dimethylglyoxamato)4-(2-ferrocenylvinyl)pyridinecobalt(III). A New Heterobinuclear Cobaloxime.**

Sebastián Pizarro<sup>1</sup>, Guillermo Saá<sup>1</sup>, Francisco Gajardo<sup>1</sup> and Álvaro Delgadillo<sup>1\*</sup>

<sup>1</sup>Departamento de Química, Facultad de Ciencias, Universidad de La Serena, Casilla 599, Benavente 980; La Serena, Chile

\*Correspondence author. Tel: +56-51-2204020; fax: + 56-51-2204399

E-mail address: [adelgadillo@userena.cl](mailto:adelgadillo@userena.cl)

## Figures Index

|                                                                                                                                                                                                                                                                      |    |
|----------------------------------------------------------------------------------------------------------------------------------------------------------------------------------------------------------------------------------------------------------------------|----|
| Figure S 1: $^1\text{H}$ -NMR of the complex $[\text{CoCl}(\text{dmgH})_2(\text{fcvpy})]$ recorded on $\text{CDCl}_3$ .....                                                                                                                                          | 3  |
| Figure S 2: Optimized geometry of the ligand fcvpy showing selected bond distances in Angstroms.<br>.....                                                                                                                                                            | 3  |
| Figure S 3: Optimized geometry of the complex $[\text{CoCl}(\text{dmgH})_2(\text{fcvpy})]$ showing selected bond<br>distances in Angstroms.....                                                                                                                      | 4  |
| Figure S 4: Calculated UV-Vis spectra of 4-ferrocenylvinylpyridine. Band width on $\frac{1}{2}$ height 42 nm<br>.....                                                                                                                                                | 5  |
| Figure S 5: Calculated UV-Vis spectra of $[\text{CoCl}(\text{dmgH})_2(\text{fcvpy})]$ . Band width on $\frac{1}{2}$ height 58 nm...                                                                                                                                  | 8  |
| Figure S 6: Cyclic voltammogram of $[\text{CoCl}(\text{dmgH})_2(\text{fcvpy})]$ recorded in acetonitrile solution of n-<br>Bu <sub>4</sub> NPF <sub>6</sub> (0.1 mol L <sup>-1</sup> ) on a glassy carbon electrode at 100 mVs <sup>-1</sup> , 20 cycles.....        | 12 |
| Figure S 7: Cyclic voltammogram of $[\text{CoCl}(\text{dmgH})_2(\text{fcvpy})]$ recorded in acetonitrile solution of n-<br>Bu <sub>4</sub> NPF <sub>6</sub> (0.1 mol L <sup>-1</sup> ) on a glassy carbon electrode at 100 mVs <sup>-1</sup> . After 20 cycles. .... | 12 |

## Tables index

|                                                                                                   |    |
|---------------------------------------------------------------------------------------------------|----|
| Table S1. TD-DFT Calculated Data fcvpy.....                                                       | 6  |
| Table S2. Energies and surfaces of the molecular orbitals involved in electronic transitions. ... | 7  |
| Table S3. TD-DFT Calculated Data for the cobaloxime.....                                          | 9  |
| Table S4. Energies and surfaces of the molecular orbitals involved in electronic transitions. .   | 10 |





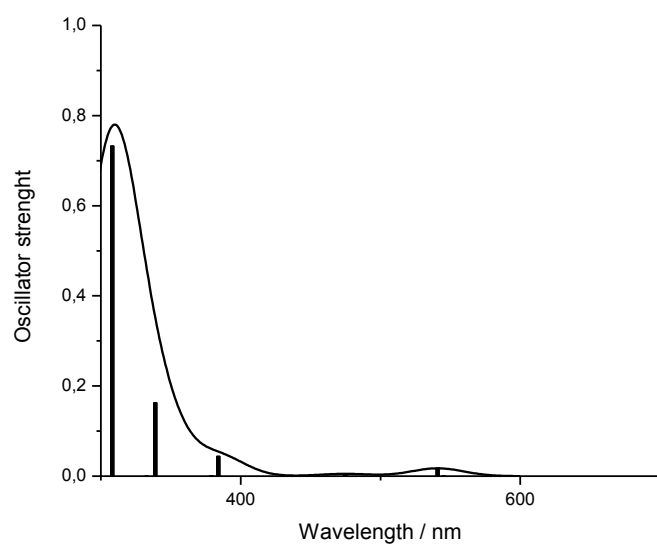

*Figure S 4: Calculated UV-Vis spectra of 4-ferrocenylvinylpyridine. Band width on  $\frac{1}{2}$  height 42 nm*

Table S1. TD-DFT Calculated Data fcvpy

| $\lambda_{\text{calc}}$<br>(nm) | $E_{\text{calc}}$<br>(eV) | $f_{\text{os}}$ | Major contributions (weight, %)                                                                         |
|---------------------------------|---------------------------|-----------------|---------------------------------------------------------------------------------------------------------|
| 546                             | 2.271                     | 0.0004          | H-1 $\rightarrow$ L (33); H-1 $\rightarrow$ L+3 (35); H $\rightarrow$ L+2 (20)                          |
| 542                             | 2.288                     | 0.0162          | H-1 $\rightarrow$ L+3 (22); H $\rightarrow$ L (29); H $\rightarrow$ L+3 (36)                            |
| 475                             | 2.609                     | 0.0047          | H-3 $\rightarrow$ L (17); H-3 $\rightarrow$ L+3 (35); H-1 $\rightarrow$ L+2 (35)                        |
| 462                             | 2.683                     | 0.0001          | H-3 $\rightarrow$ L+2 (31); H $\rightarrow$ L+2 (40)                                                    |
| 383                             | 3.230                     | 0.0431          | H-3 $\rightarrow$ L (13); H-3 $\rightarrow$ L+3 (13); H-1 $\rightarrow$ L+2(25); H $\rightarrow$ L (42) |
| 378                             | 3.275                     | 0.0012          | H-3 $\rightarrow$ L+2 (28); H-1 $\rightarrow$ L (51)                                                    |
| 338                             | 3.660                     | 0.1535          | H $\rightarrow$ L (27); H $\rightarrow$ L+3 (44)                                                        |

All calculations used the 6-31G(d) basis set with the B3LYP functional. Only contributions greater than 12 % are shown. H = HOMO, L = LUMO

Table S2. Energies (hartree) and surfaces of the molecular orbitals involved in electronic transitions.

|                    |                                                                                      |
|--------------------|--------------------------------------------------------------------------------------|
| HOMO-3<br>-0.24690 | 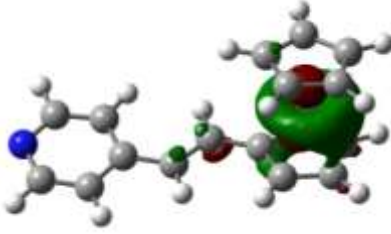   |
| HOMO-1<br>-0.21334 |    |
| HOMO<br>-0.20874   |   |
| LUMO<br>-0.06746   |  |
| LUMO+2<br>-0.02579 |  |

LUMO+3  
-0.02012

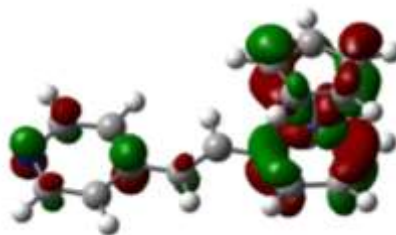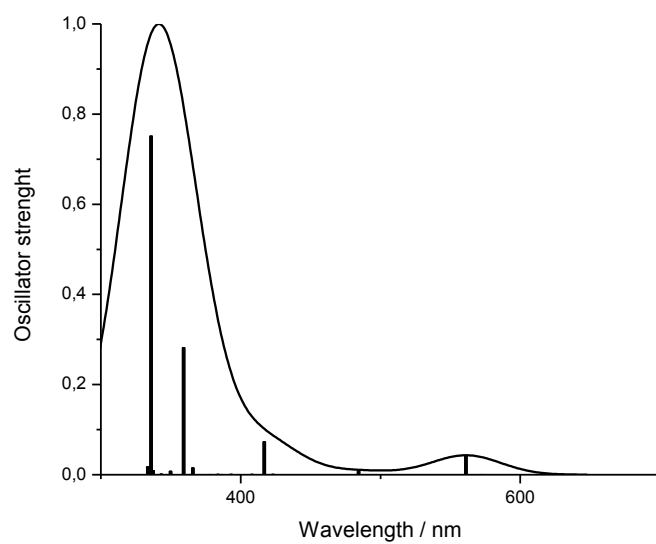

*Figure S 5: Calculated UV-Vis spectra of [CoCl(dmgh)<sub>2</sub>(fcvpy)]. Band width on 1/2 height 58 nm*



Table S3. TD-DFT Calculated Data for the cobaloxime

| $\lambda_{\text{calc}}$ | $E_{\text{calc}}$ | $f_{\text{os}}$ | Major contributions (weight, %)                |
|-------------------------|-------------------|-----------------|------------------------------------------------|
| (nm)                    | (eV)              |                 |                                                |
| 561                     | 2.210             | 0.0427          | H-1→L+7 (21); H→L (32); H→L+6 (30)             |
| 416                     | 2.974             | 0.0733          | H-1→L+7 (21); H→L (45)                         |
| 359                     | 3.452             | 0.2819          | H-4→L (23); H-1→L+7 (17); H→L (12); H→L+6 (32) |
| 335                     | 3.690             | 0.7517          | H-5→L (34); H-4→L (60)                         |

All calculations used the 6-31G(d) basis set with the B3LYP functional. Only contributions greater than 12 % are shown. H = HOMO, L = LUMO

Table S4. Energies and surfaces of the molecular orbitals involved in electronic transitions.

|        |                                                                                      |
|--------|--------------------------------------------------------------------------------------|
| HOMO-5 | 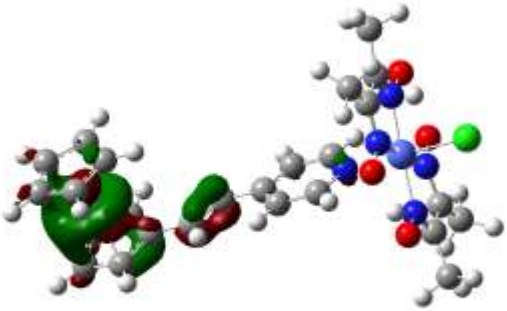   |
| HOMO-4 |    |
| HOMO-1 |  |
| HOMO   |  |

|         |                                                                                      |
|---------|--------------------------------------------------------------------------------------|
| LUMO    | 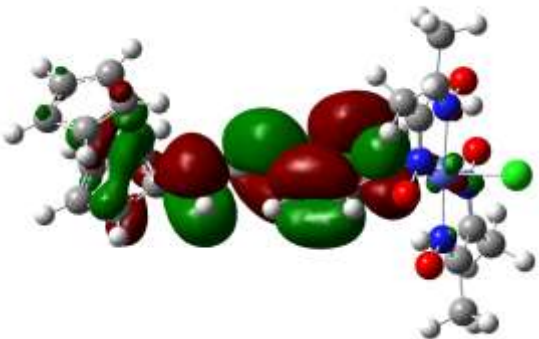   |
| LUMO +6 |    |
| LUMO +7 |  |

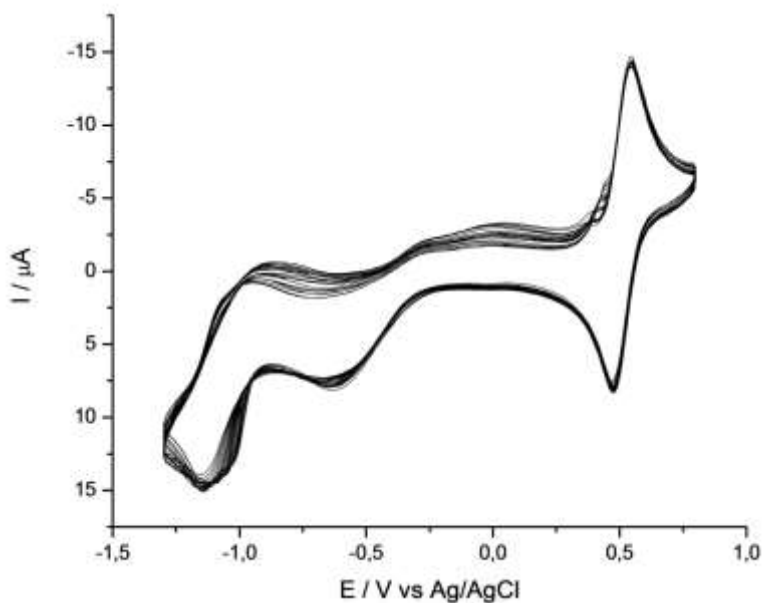

Figure S 6: Cyclic voltammogram of  $[\text{CoCl}(\text{dmgH})_2(\text{fcvpy})]$  recorded in acetonitrile solution of  $n\text{-Bu}_4\text{NPF}_6$  ( $0.1 \text{ mol L}^{-1}$ ) on a glassy carbon electrode at  $100 \text{ mVs}^{-1}$ , 20 cycles.

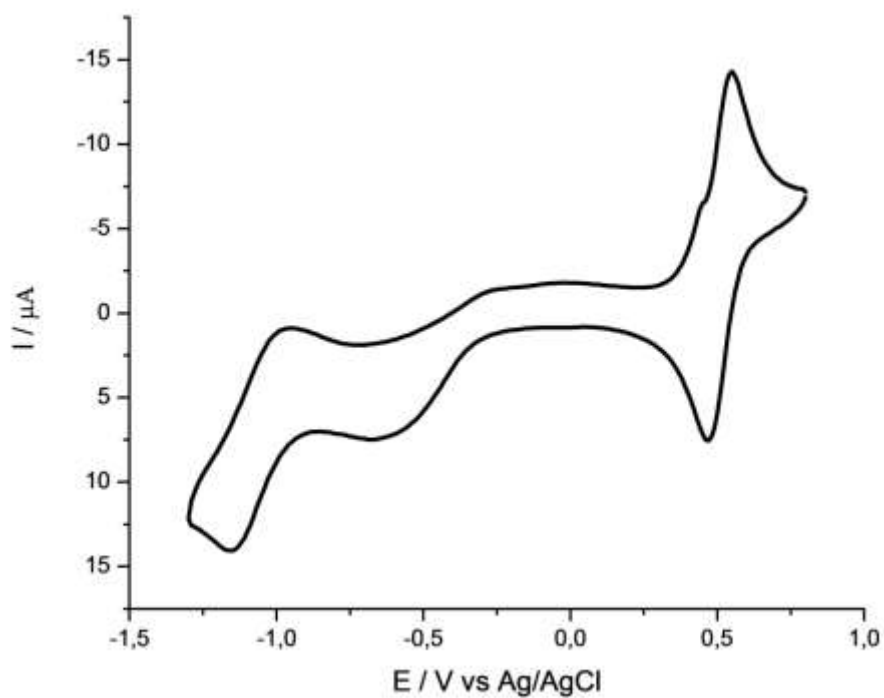

Figure S 7: Cyclic voltammogram of  $[\text{CoCl}(\text{dmgH})_2(\text{fcvpy})]$  recorded in acetonitrile solution of  $n\text{-Bu}_4\text{NPF}_6$  ( $0.1 \text{ mol L}^{-1}$ ) on a glassy carbon electrode at  $100 \text{ mVs}^{-1}$ . After 20 cycles.
